# Supplementary material for: Postoperative radiation therapy is associated with a reduced risk of local recurrence among low risk Merkel cell carcinomas of the head and neck
Source: PubMed Central journal article supplement — Adv Radiat Oncol. 2016 Oct 20;1(4):244–51. doi: 10.1016/j.adro.2016.10.003 (PMC5514235; doi:10.1016/j.adro.2016.10.003), 2016-10-20
Supplement: mmc1.pdf [file mmc1.pdf]

**Table 1.** Lymphovascular Invasion

**Table 1a.** Comparison of LVI Between Patients Treated with and Without PORT

|                             | No. of Patients |                       | <i>P</i> * |
|-----------------------------|-----------------|-----------------------|------------|
|                             | <b>Surgery</b>  | <b>Surgery + PORT</b> |            |
| <b>LVI Absent</b>           | 15              | 10                    | 0.20       |
| <b>LVI Present</b>          | 5               | 5                     |            |
| <b>LVI Data Unavailable</b> | 3               | 8                     |            |
| Total                       | 23              | 23                    |            |

**Table 1b.** Influence of LVI on Local Recurrence

|                    | No. of Patients             |                         |                 |
|--------------------|-----------------------------|-------------------------|-----------------|
|                    | <b>Didn't Recur Locally</b> | <b>Recurred Locally</b> | Total           |
| <b>LVI Absent</b>  | 20                          | 5                       | 25              |
| <b>LVI Present</b> | 9                           | 1                       | 10              |
| Total              | 29                          | 6                       | 35 <sup>†</sup> |

---

Abbreviations: LVI, lymphovascular invasion

\**P* value per Fisher's exact test.

<sup>†</sup>LVI data was available for 35 patients.

## Breslow Thickness by Individual Patient

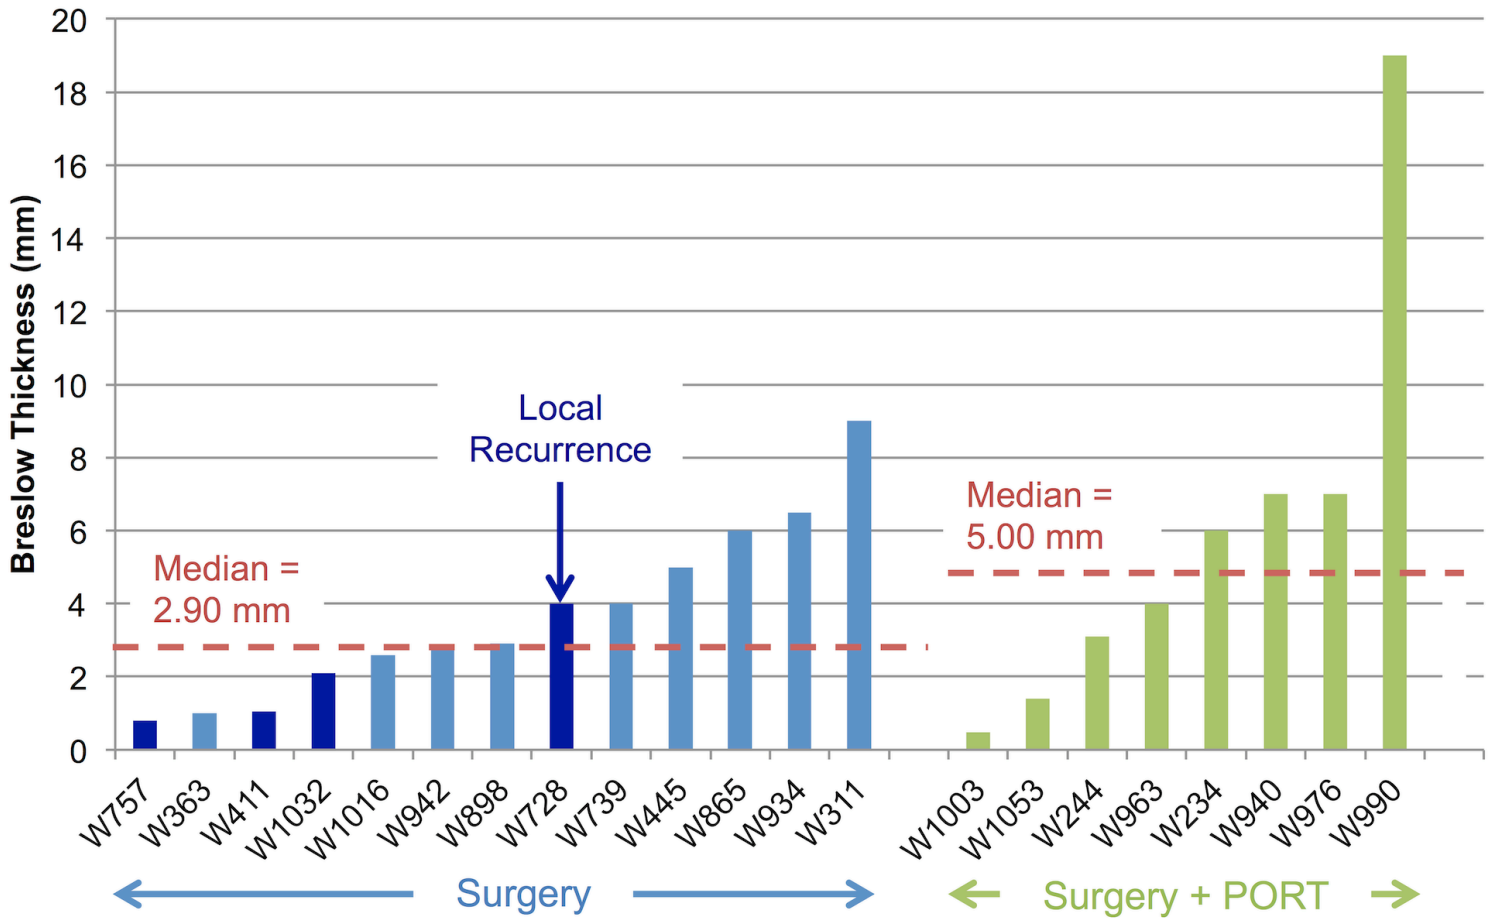

Supplementary Figure 1. Depth of Invasion. Data on 21 patients where depth of invasion data was available. The median tumor depth was greater in the surgery + PORT group (5.00 mm) when compared to the surgery group (2.90 mm). Tumor depth information was available for four out of six patients who experienced a local recurrence. Dark blue bars represent patients who experienced a local recurrence.

**Table 2.** Local Recurrence Rates Excluding Patients with Unknown Surgical Margin Width

|                             | No. of Patients |                       | <i>P</i> * |
|-----------------------------|-----------------|-----------------------|------------|
|                             | <b>Surgery</b>  | <b>Surgery + PORT</b> |            |
| <b>Didn't Recur Locally</b> | 15              | 21                    | 0.02       |
| <b>Recurred Locally</b>     | 6               | 0                     |            |
| Total                       | 21              | 21                    |            |

---

\**P* value per Fisher's exact test.

## Overall Survival

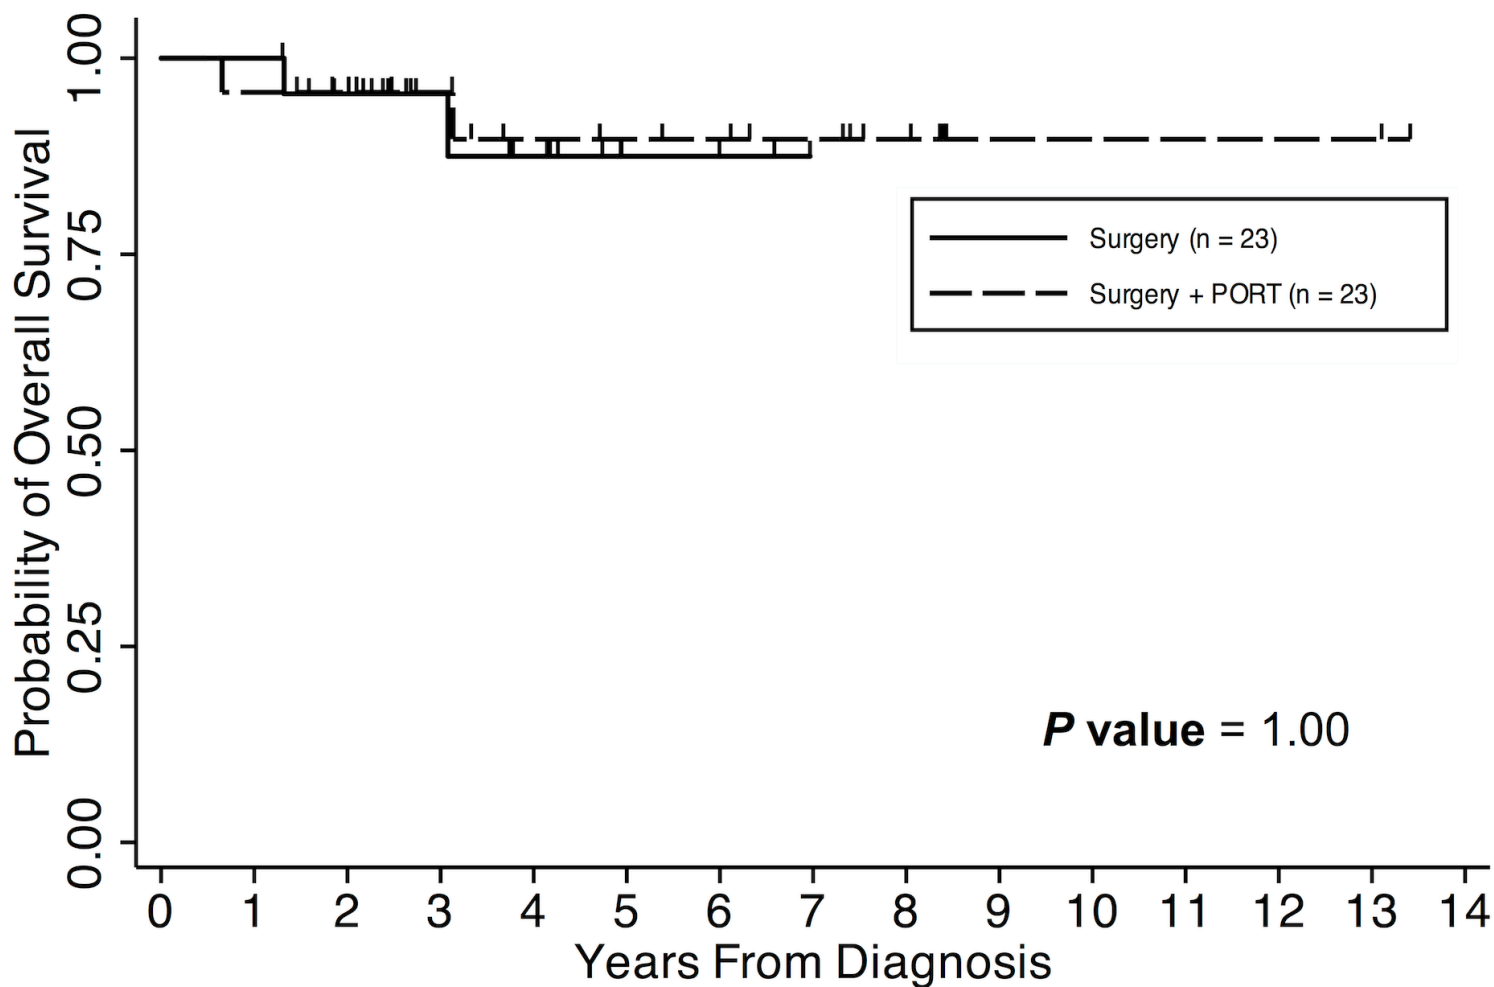

|                     |    |    |    |   |   |   |                   |
|---------------------|----|----|----|---|---|---|-------------------|
| Patients<br>at Risk | 23 | 12 | 3  | 0 | 0 | 0 | Surgery<br>Alone  |
|                     | 22 | 17 | 12 | 9 | 2 | 2 | Surgery +<br>PORT |

Supplementary Figure 2. Overall survival (OS) is illustrated for 46 low-risk patients. One patient died in each group due to MCC, and one patient died in each group from a non-MCC cause. There was no significant difference in OS between patients treated with surgery alone and those treated with surgery + PORT ( $P = 1.00$ ). PORT indicates post-operative radiation therapy.
